# Supplementary material
Source: PubMed Central journal article supplement (PMC3322456)
Supplement: cc0913_2640SD1.pdf [file cc0913_2640SD1.pdf]

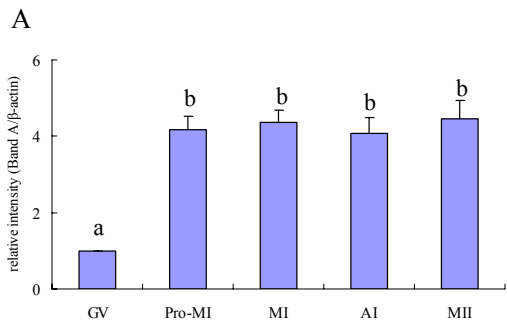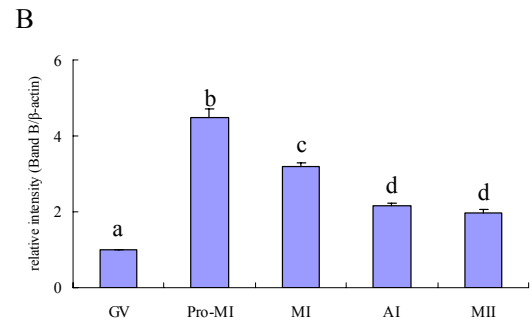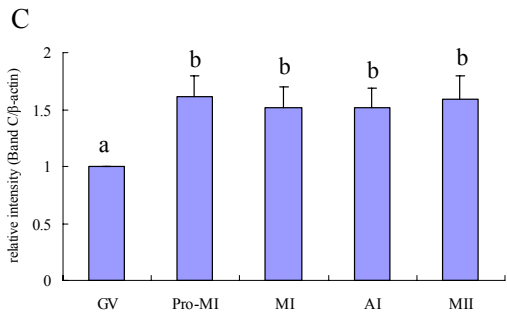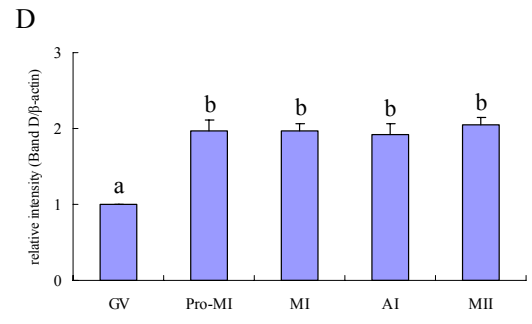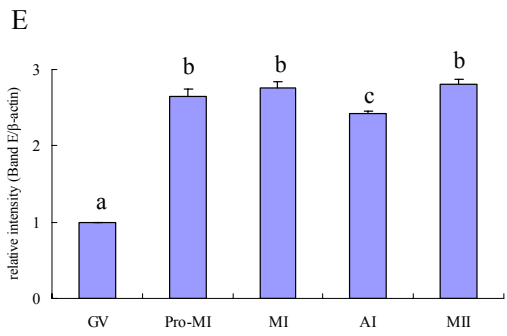

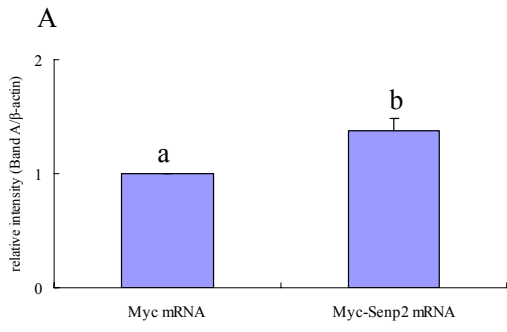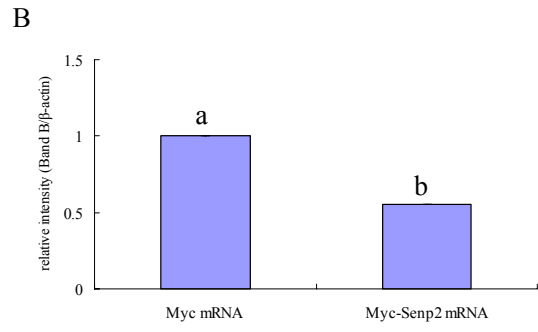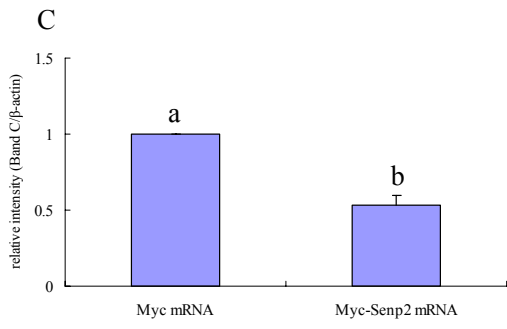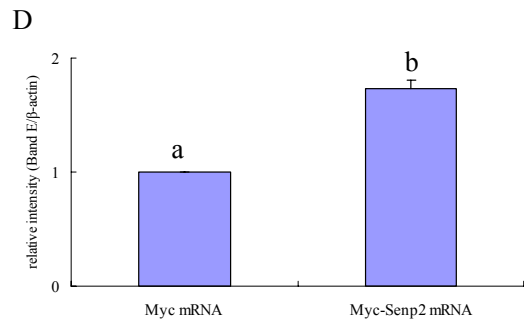

Supplementary Figure S1. Gray-scale analysis for expression of SUMO-1 and SUMO-2/3 modified proteins. The software Quantity One was used to analyze the expression level of SUMO-1 and SUMO-2/3 modified proteins by immunoblot analysis. Levels of expression were normalized to levels of  $\beta$ -actin and each bar represents mean $\pm$  SEM (n=3). Different letters (a,b,c,d) in each histogram indicate statistically significant. A,B,C,D,E, expression of Band A,B,C,D,E respectively.

Supplementary Figure S2. Gray analysis for the changes of SUMO modified proteins caused by over-expression of Senp2. The analysis was performed to check the inhibition and accumulation in SUMO modified proteins by Quantity One . Levels of expression were normalized to levels of  $\beta$ -actin and each bar represents mean $\pm$  SEM (n=3). Different letters (a,b) in each histogram indicate statistically significant. A,B,C,D ,expression of Band A,B,C,E, respectively.
